# Supplementary material
Source: publisher figshare collection journal article supplement (https://tandf.figshare.com/ndownloader/files/21844434)
Supplement: Supplementary file 1 [file 21844434]

**Anion Recognition Using a Simple Cyclic Peptide**

Genevieve E. Sergeanta and Katrina A. Jolliffe*a

a School of Chemistry, The University of Sydney, NSW 2006, Australia.

Email: [kate.jolliffe@sydney.edu.au](mailto:kate.jolliffe@sydney.edu.au)

**Table of Contents:**

**General experimental 2**

**2D NMR Characterisation and Proton assignments of 1 3**

**1H NMR Binding studies: stackplots and binding isotherms 6**

**References 23**

**General experimental**

1H NMR spectra were recorded at 300 K using a Bruker Avance III 400 spectrometer at a frequency of 400 MHz and are reported as parts per million (ppm) with DMSO-*d6* (δH 2.50 ppm) or CD3CN (δH 1.96 ppm) as an internal reference. The data are reported as chemical shift (δ), multiplicity (br = broad, s = singlet, d = doublet, dd = doublet of doublets, dt = doublet of triplets, t = triplet, q = quartet, m = multiplet, br s = broad singlet), coupling constant (*J* Hz) and relative integral. 13C NMR spectra were recorded using a Bruker Avance III 400 spectrometer at a frequency of 100.6 MHz and are reported as parts per million (ppm) with DMSO-*d6* (δC 39.5 ppm) or CD3CN (δC 1.8 and 118.3 ppm) as an internal reference. Low resolution mass spectra were recorded using a Bruker amaZon SL mass spectrometer using electronspray ionization (ESI) in positive mode. Samples were injected as a dilute solution in methanol. Analytical TLC was performed using precoated silica gel plates (Merck Kieselgel 60 F254). Tetrabutylammonium salts were used as supplied and were stored in a vacuum desiccator over silica drying beads and phosphorous pentoxide. All other materials were commercially available and used without further purification. Laboratory grade solvent was used unless otherwise specified.

**2D NMR Characterisation and Proton assignments**

## COSY NMR

Figure S1. COSY-NMR spectra of 1 (DMSO-*d6,* 500 MHz)

## HSQC NMR

Figure S2. HSQC-NMR of 1 (DMSO-d6, 500 MHz)

## Proton assignments


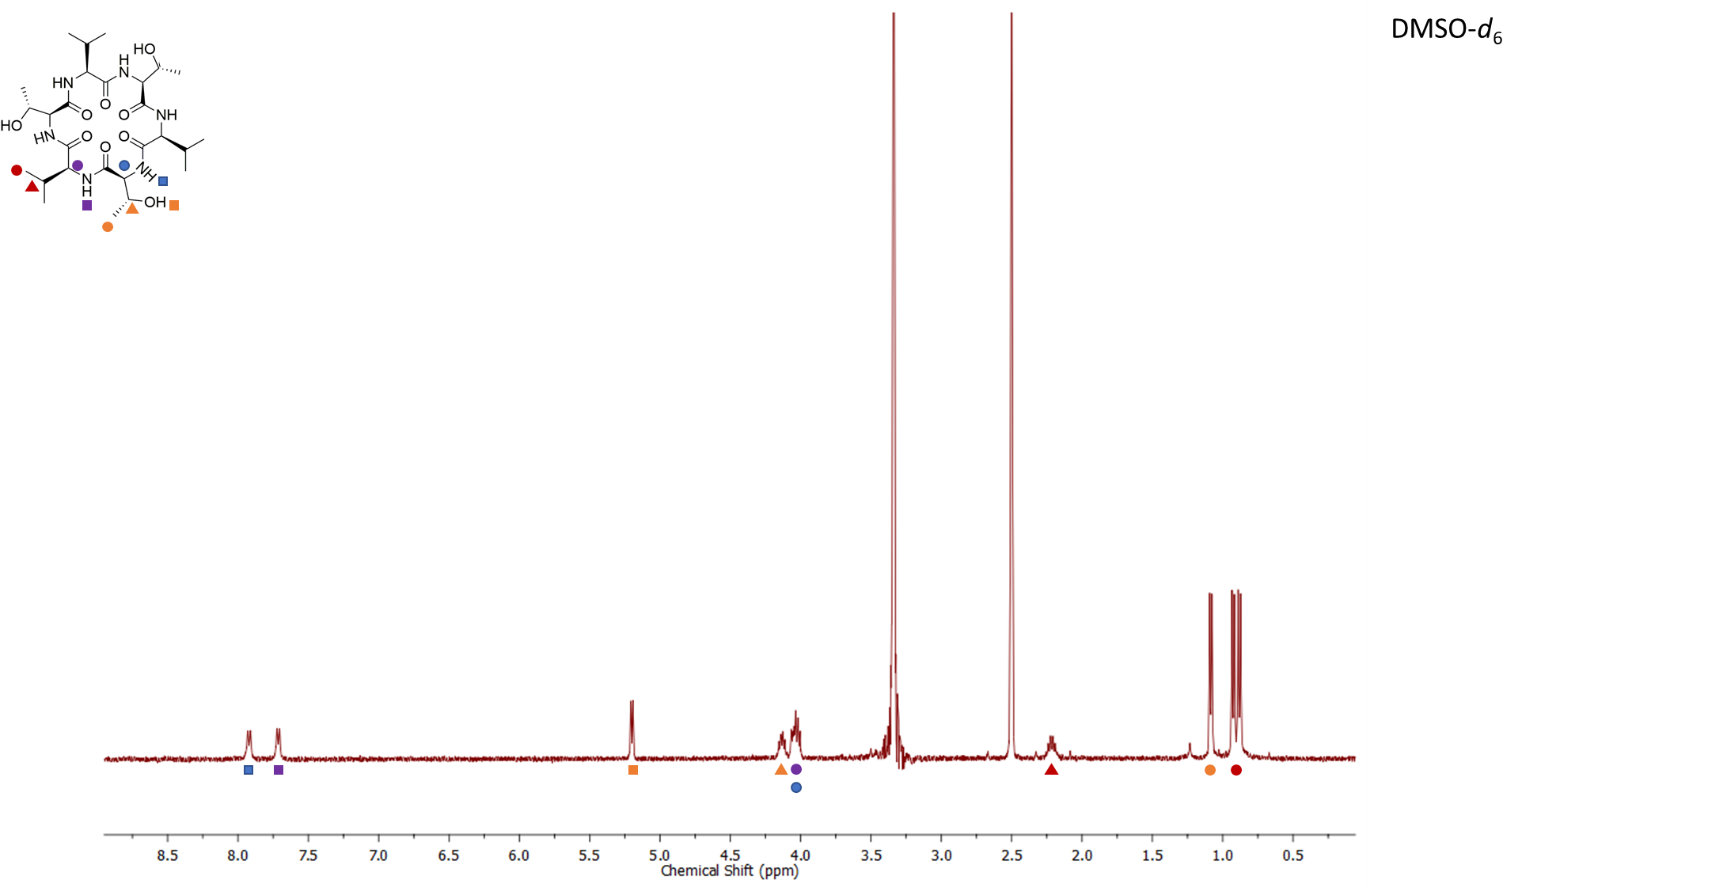


Figure S3. 1H NMR (DMSO-*d*6, 400 MHz) of 1 showing proton assignments.


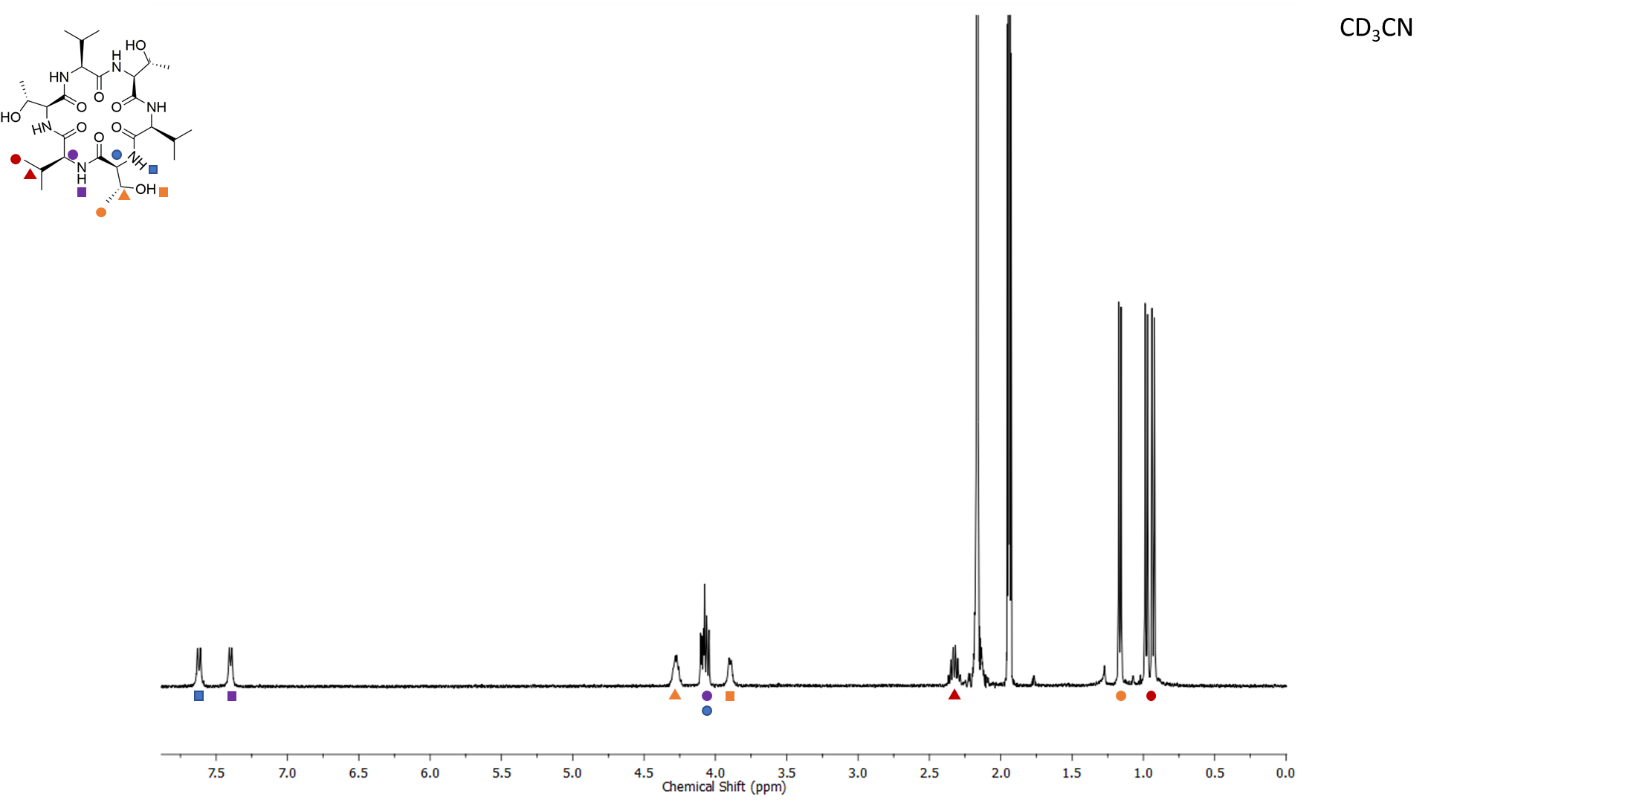


Figure S4. 1H NMR (CD3CN, 400 MHz) of 1 showing proton assignments.

**1H NMR Binding studies: stackplots and binding isotherms**

Representative stack plots and binding isotherms are displayed. Where appropriate, the bindfit2 fitting results are plotted against the experiment proton resonances.

## TBACl CD3CN


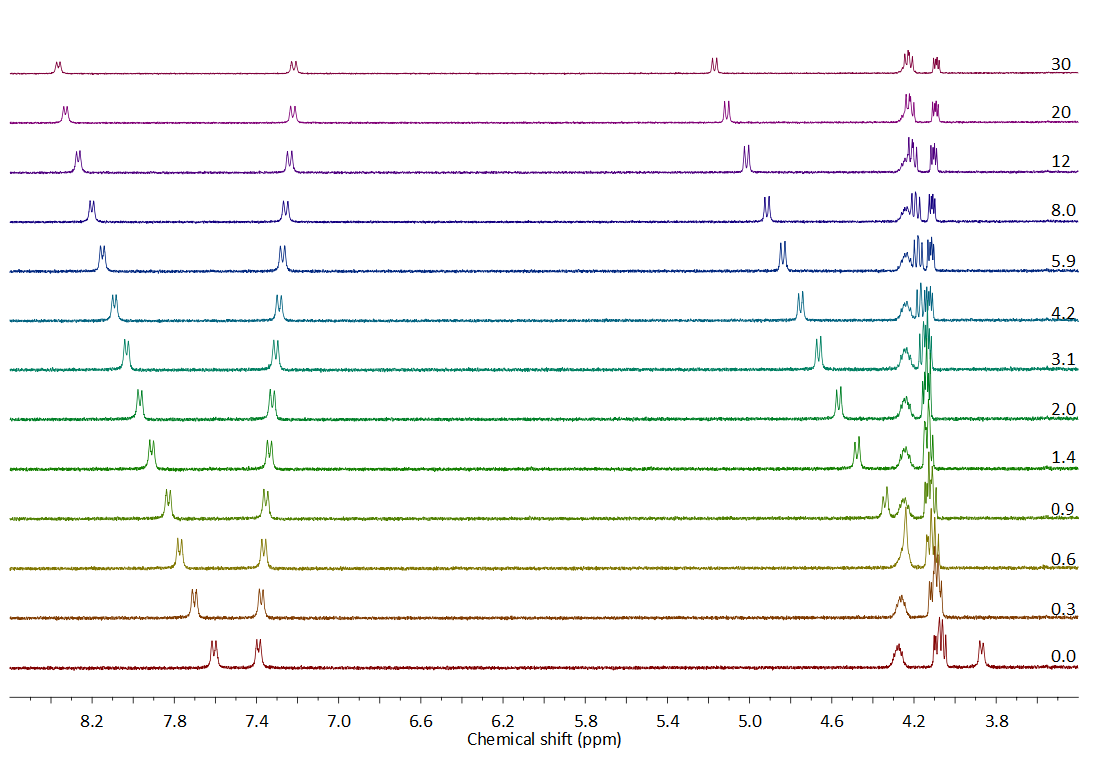


Figure S5. Partial 1H NMR (400 MHz) spectra of 1 (3 mM) with addition of TBACl in CH3CN at 300 K.

Figure S6. Binding isotherm of the NH(Thr) proton with addition of TBACl in CH3CN at 300 K with fitting shown.

Figure S7. Binding isotherm of the NH(Val) proton with addition of TBACl in CH3CN at 300 K with fitting shown.

Figure S8. Binding isotherm of the hydroxyl proton with addition of TBACl in CH3CN at 300 K with fitting shown.

## TBACl DMSO-*d*6

**
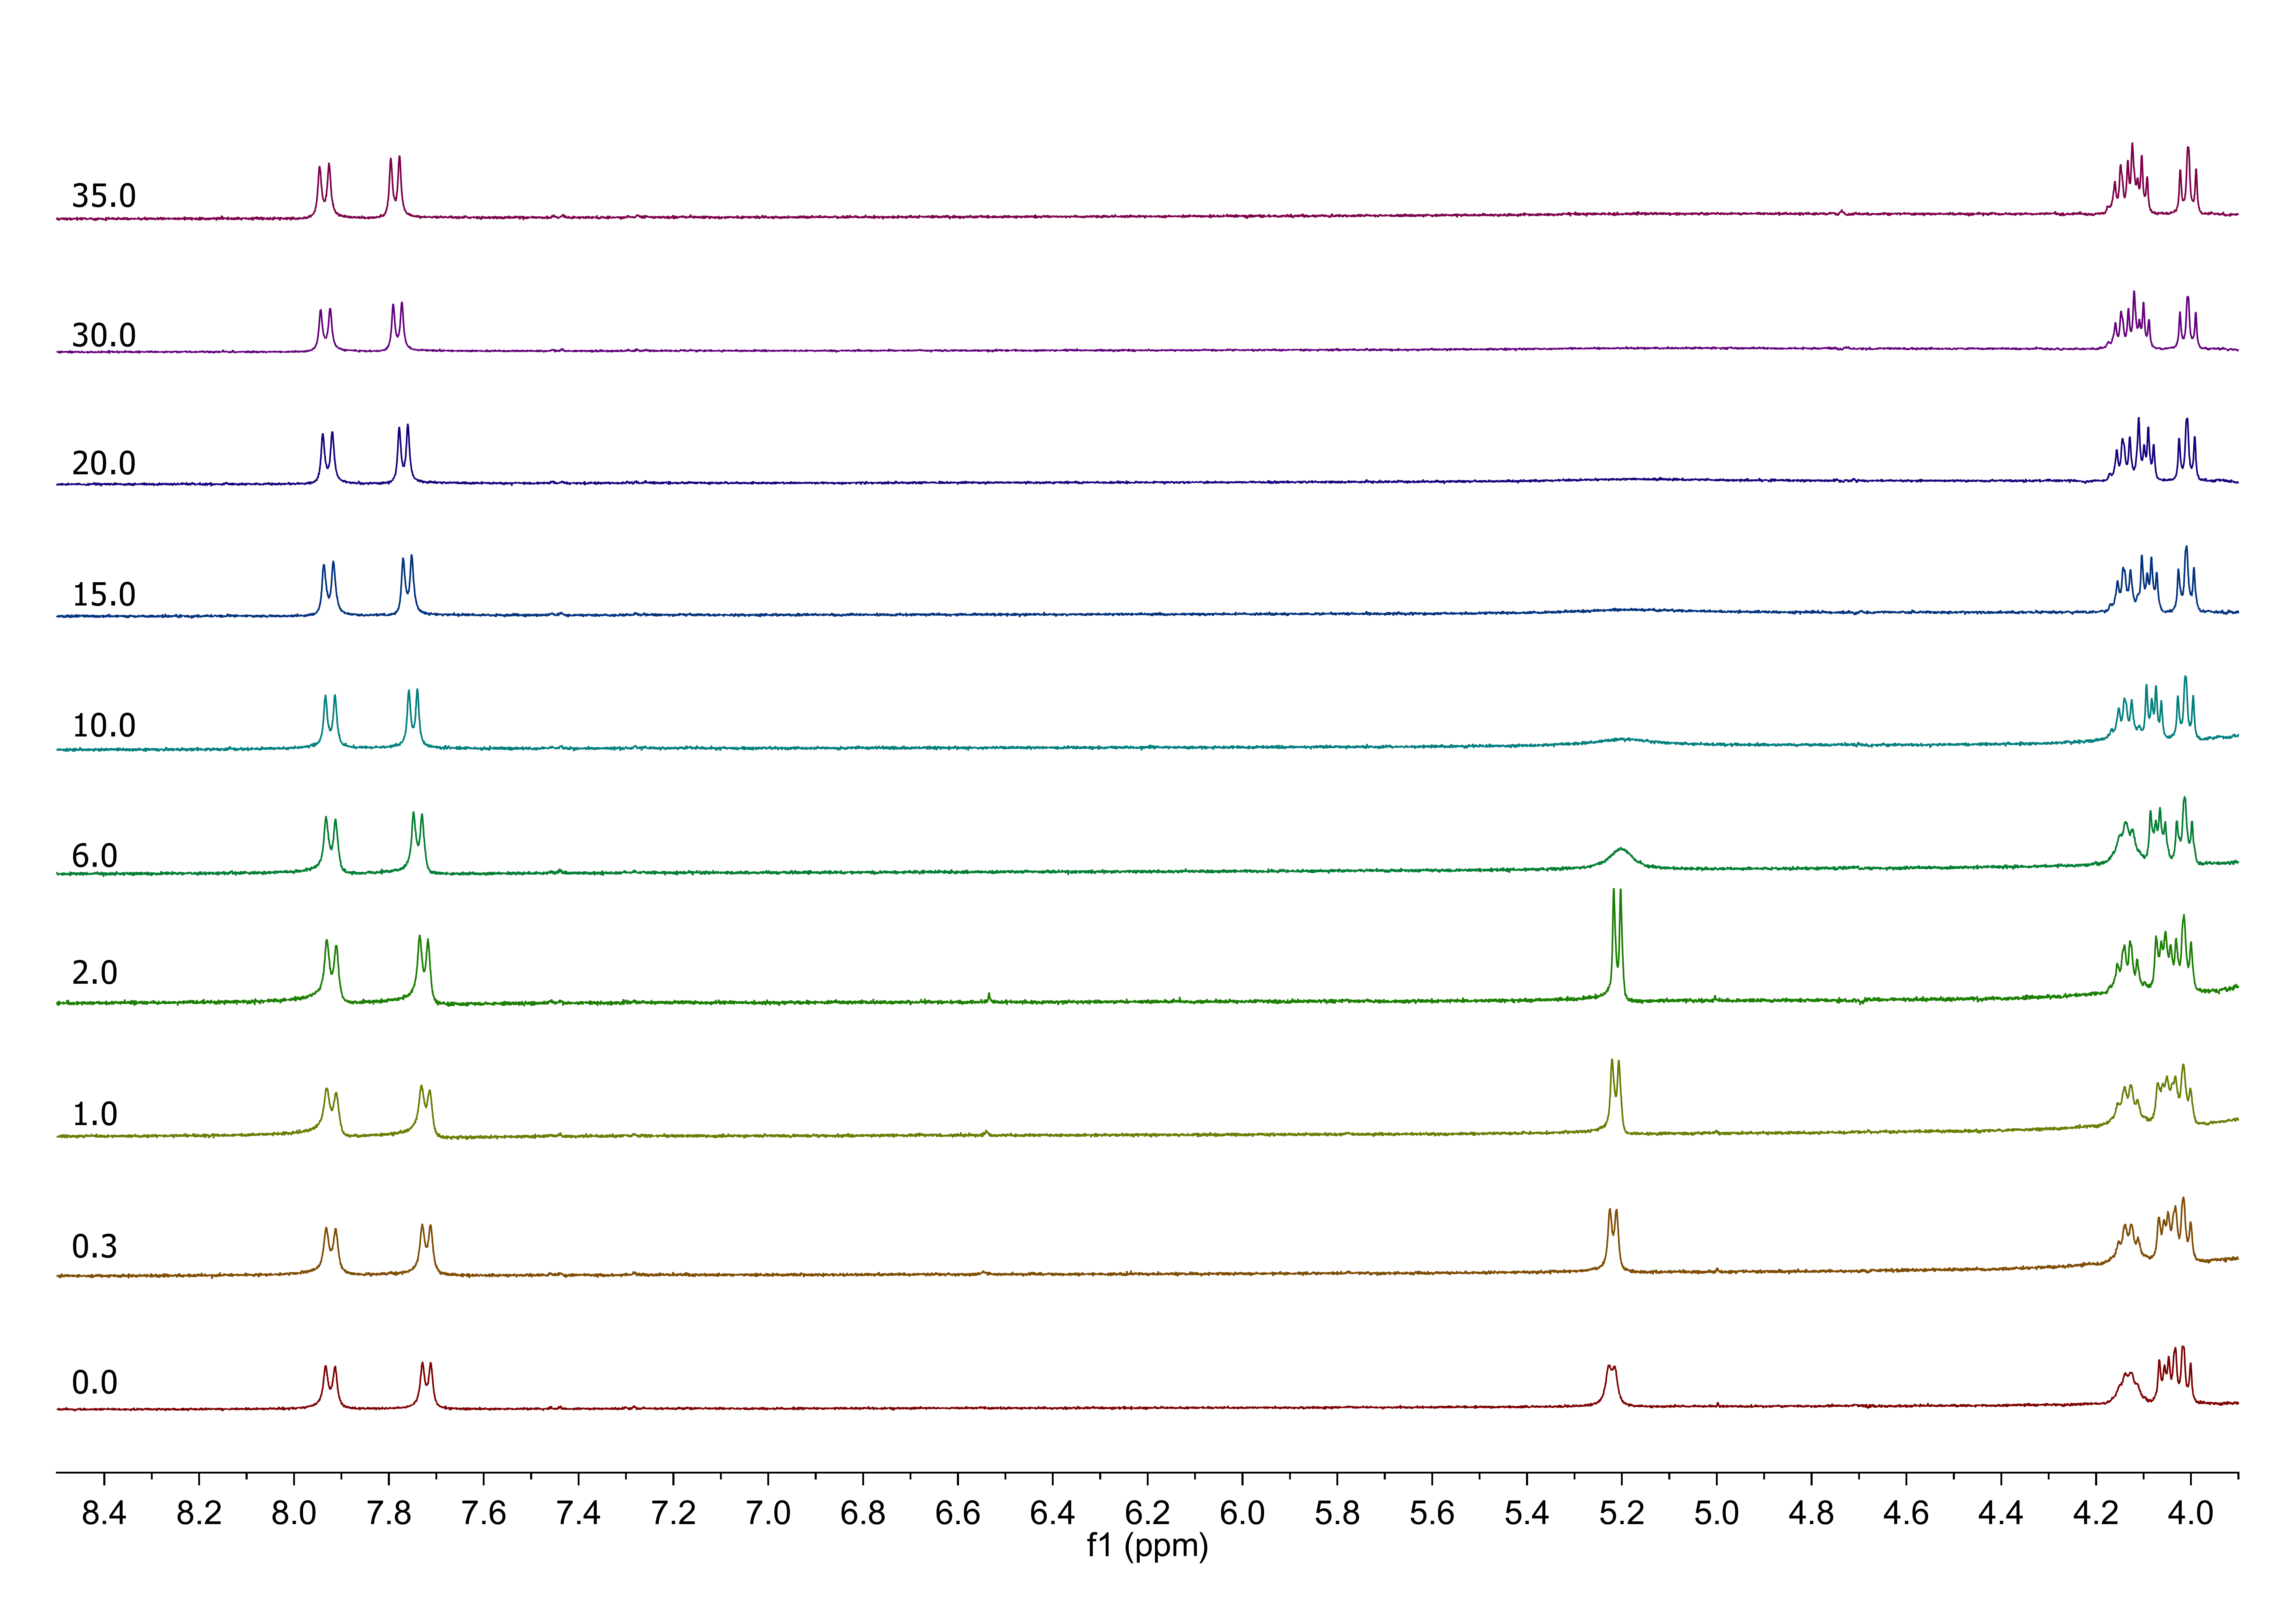
**

Figure S9. Partial 1H NMR (400 MHz) spectra of 1 (3 mM) with addition of TBACl in DMSO-d6 at 300 K.

Figure S10. Binding isotherm of the NH(Val) proton with addition of TBACl in DMSO-d6 at 300 K with fitting shown.

## TEAHCO3 DMSO-*d*6


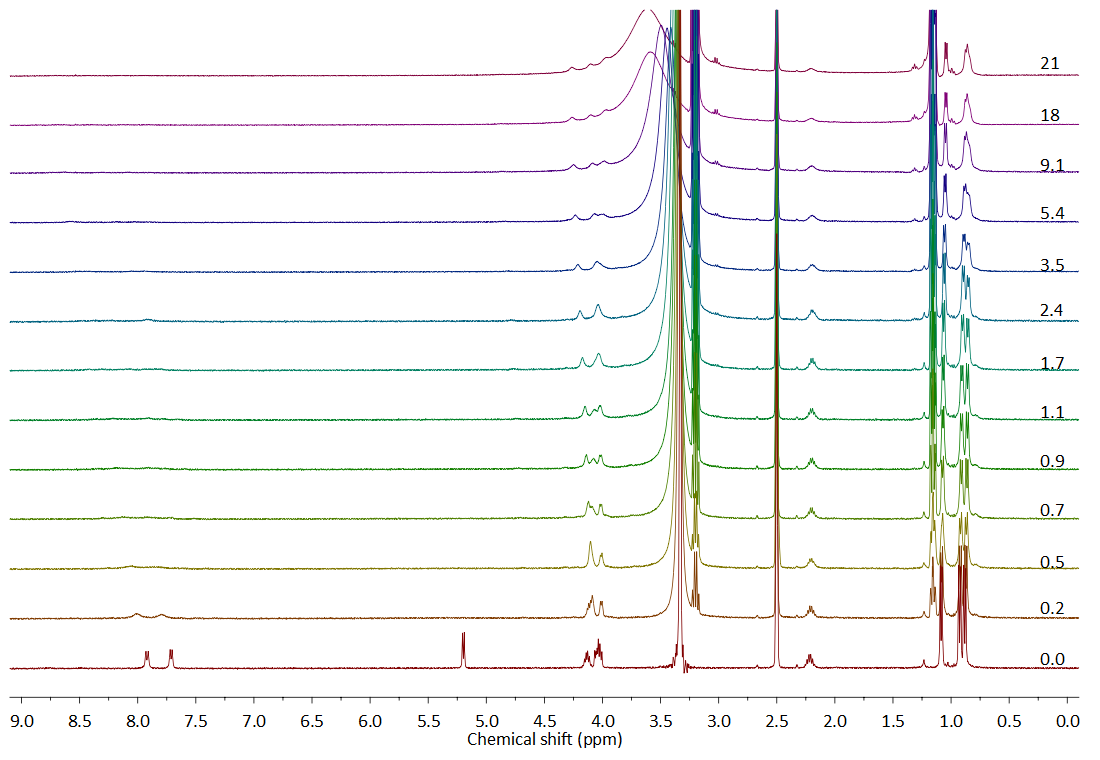


Figure S11. Partial 1H NMR (400 MHz) spectra of 1 (3 mM) with addition of TEAHCO3 in DMSO-d6 at 300 K


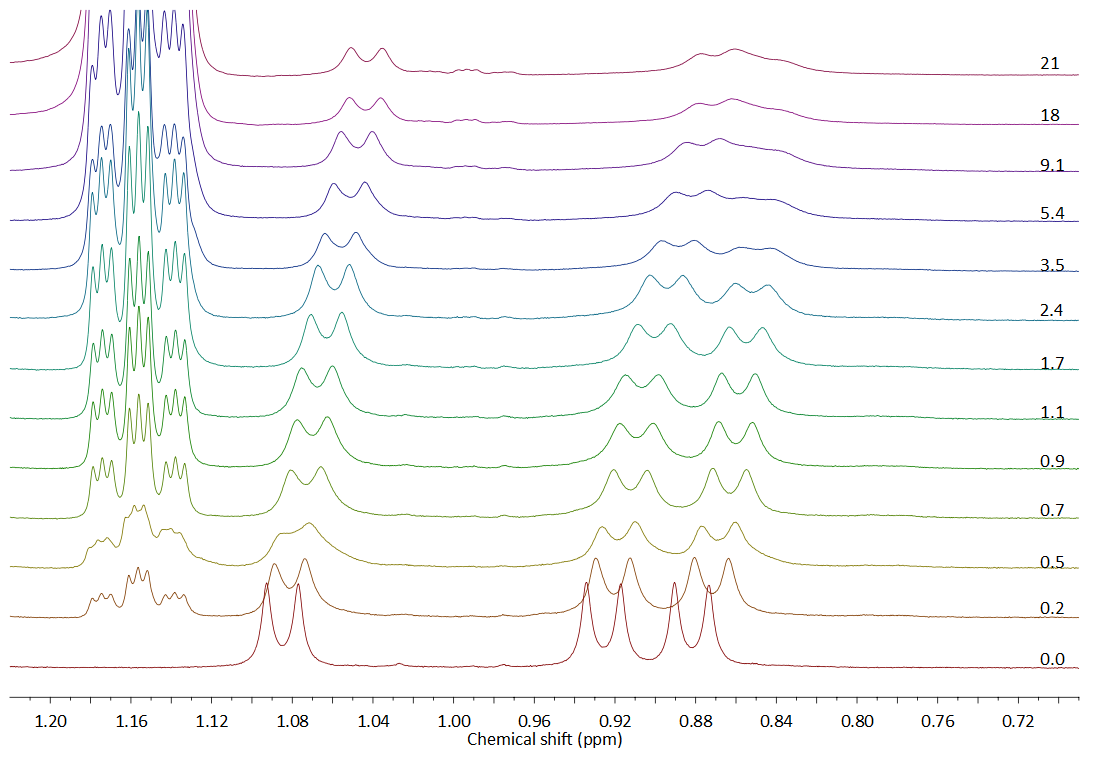


Figure S12. Partial 1H NMR (400 MHz) spectra of 1 (3 mM) with addition of TEAHCO3 in DMSO-d6 at 300 K

## TBAH2PO4 DMSO-*d*6


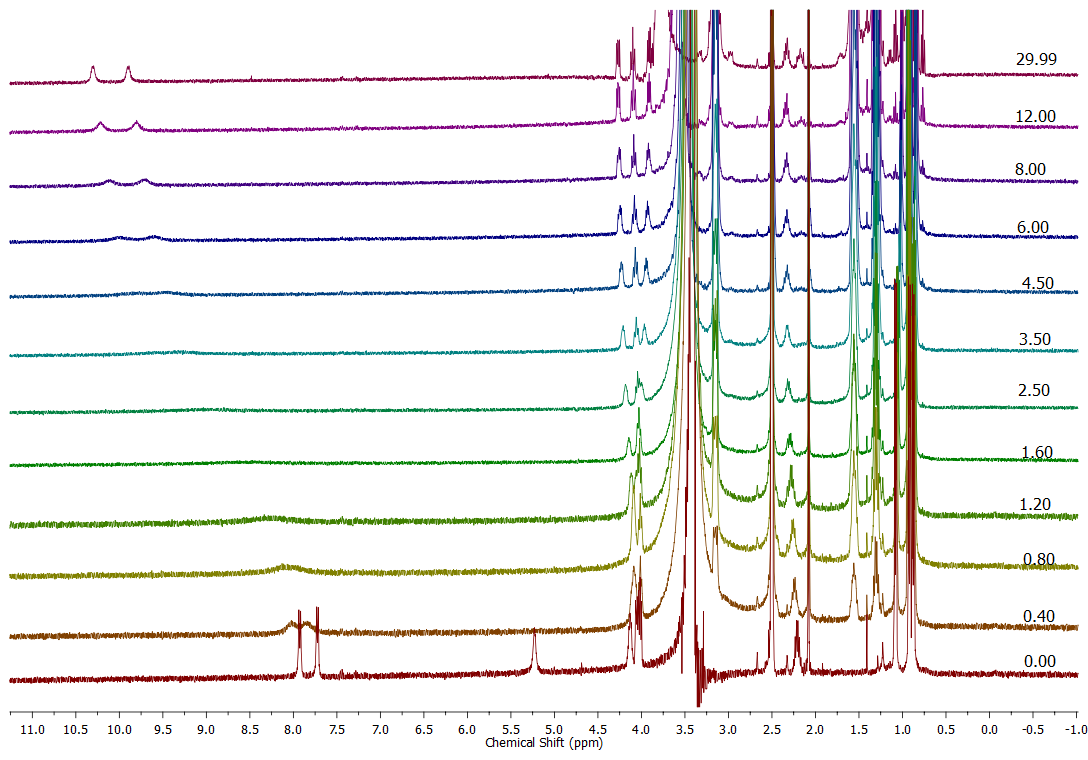


Figure S13. Partial 1H NMR (400 MHz) spectra of 1 (3 mM) with addition of TBAH2PO4 in DMSO-d6 at 300 K


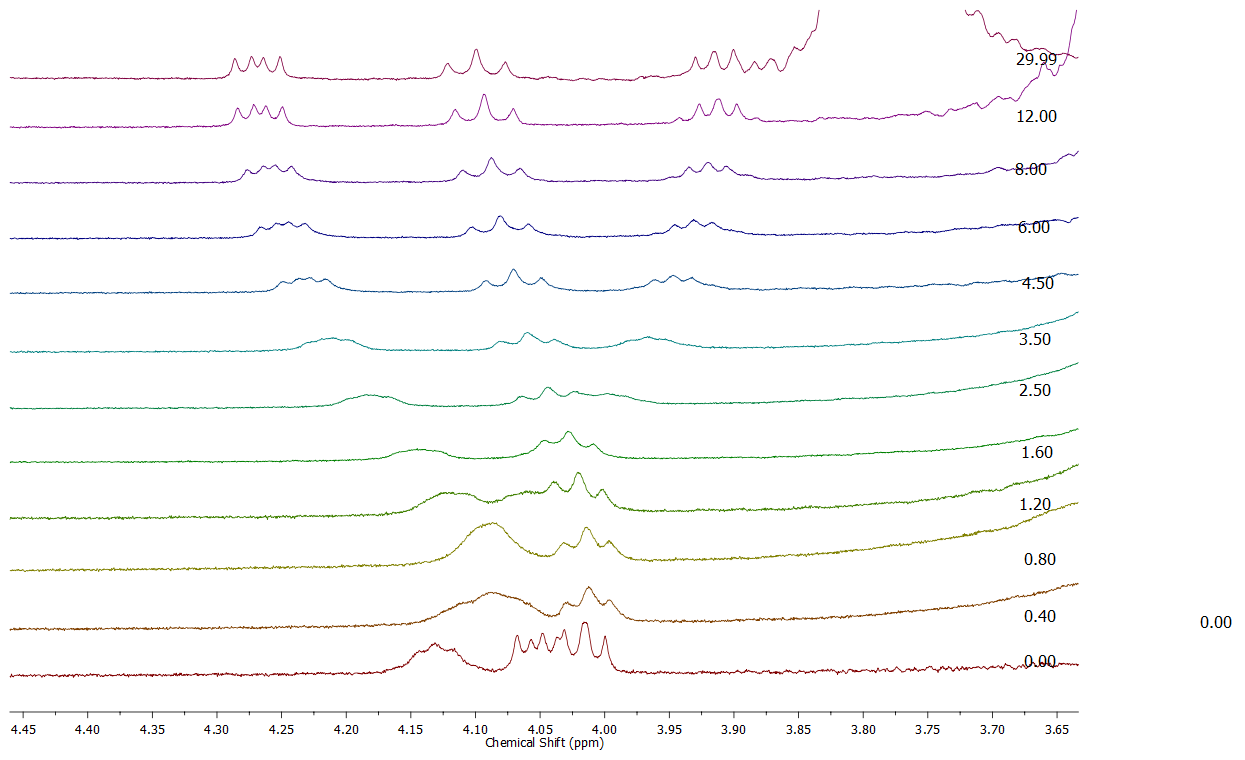


Figure S14. Partial 1H NMR (400 MHz) spectra of 1 (3 mM) with addition of TBAH2PO4 in DMSO-d6 at 300 K

Figure S15. Binding isotherm of the NH (Thr) proton with addition of TBAH2PO4 in DMSO-d6 at 300 K.

Figure S16. Binding isotherm of the NH (Val) proton with addition of TBAH2PO4 in DMSO-d6 at 300 K with fitting shown.

## TBA2SO4 DMSO-d6


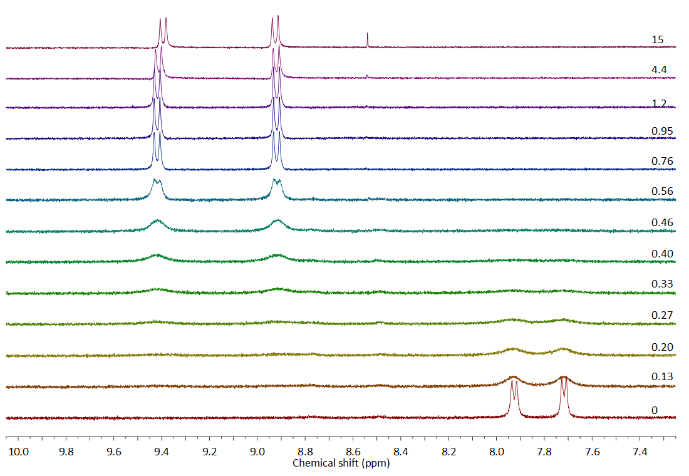


Figure S17. Partial 1H NMR (400 MHz) spectra of 1 (3 mM) with addition of TBA2SO4 in DMSO-d6 at 300 K


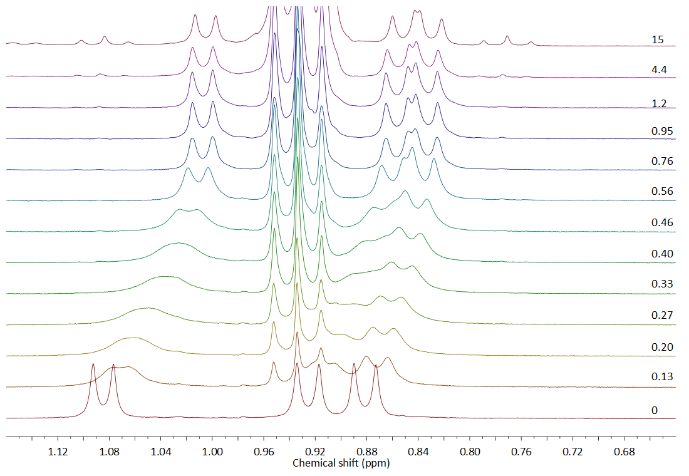


Figure S18. Partial 1H NMR (400 MHz) spectra of 1 (3 mM) with addition of TBA2SO4 in DMSO-d6 at 300 K.


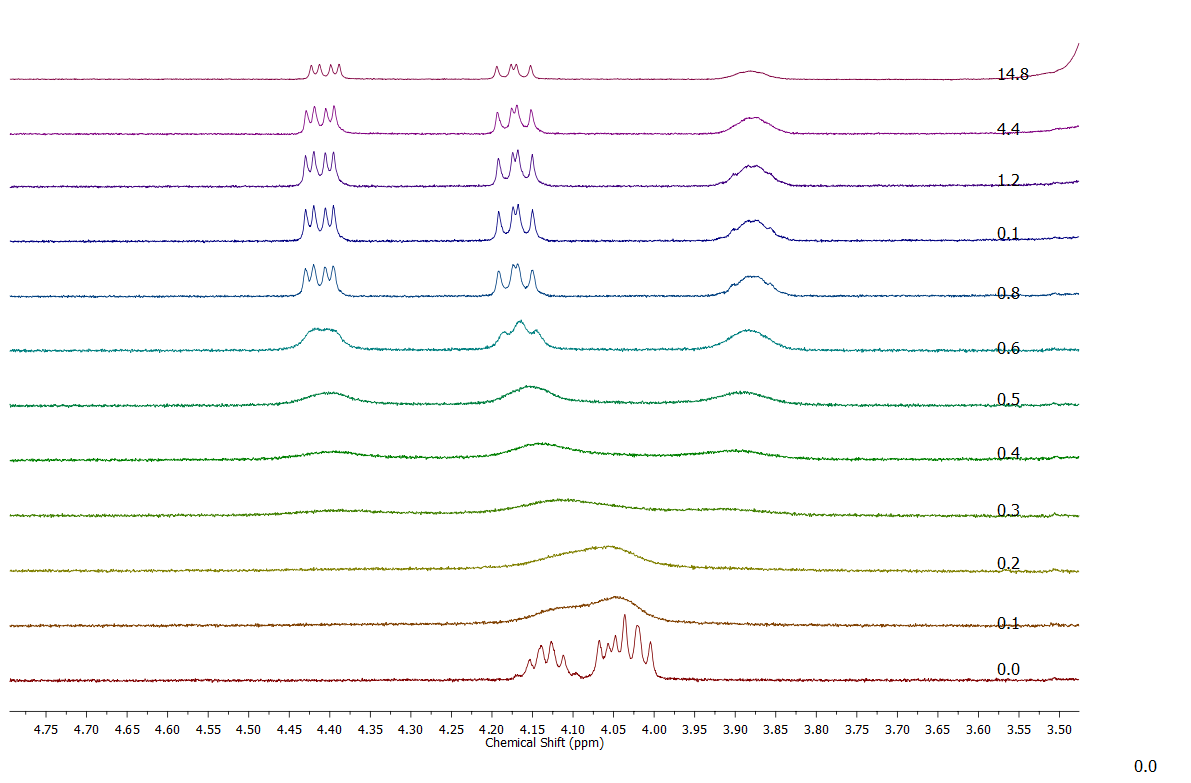


Figure S19. Partial 1H NMR (400 MHz) spectra of 1 (3 mM) with addition of TBA2SO4 in DMSO-d6 at 300 K

Figure S20. Binding isotherm of the γ (Thr) proton with addition of TBA2SO4 in DMSO-d6

Figure S21. Binding isotherm of the γ (Val) proton with addition of TBA2SO4 in DMSO-d6

Figure S22. Binding isotherm of the γ (Val) proton with addition of TBA2SO4 in DMSO-d6

TBA2SO4 20% H2O in DMSO-d6


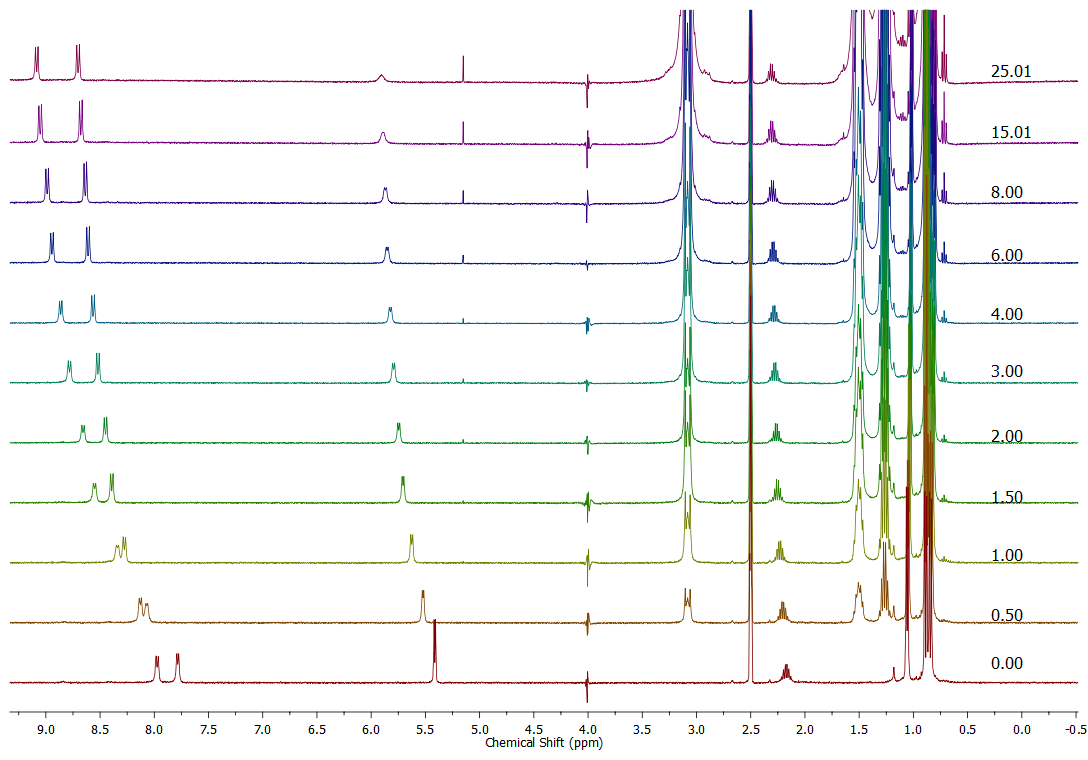


Figure S23. Partial 1H NMR (400 MHz) spectra of 1 (3 mM) with addition of TBA2SO4 in 20% H2O in DMSO-d6 at 300 K.

Figure S24. Binding isotherm of the NH (Thr) proton with addition of TBA2SO4 in TBA2SO4 in 20% H2O in DMSO-d6 at 300 K with fitting shown.

Figure S25. Binding isotherm of the NH (Val) proton with addition of TBA2SO4 in TBA2SO4 in 20% H2O in DMSO-d6 at 300 K with fitting shown.

Figure S26. Binding isotherm of the hydroxyl proton with addition of TBA2SO4 in TBA2SO4 in 20% H2O in DMSO-d6 at 300 K with fitting shown.

## TBA2SeO4 DMSO-*d*6


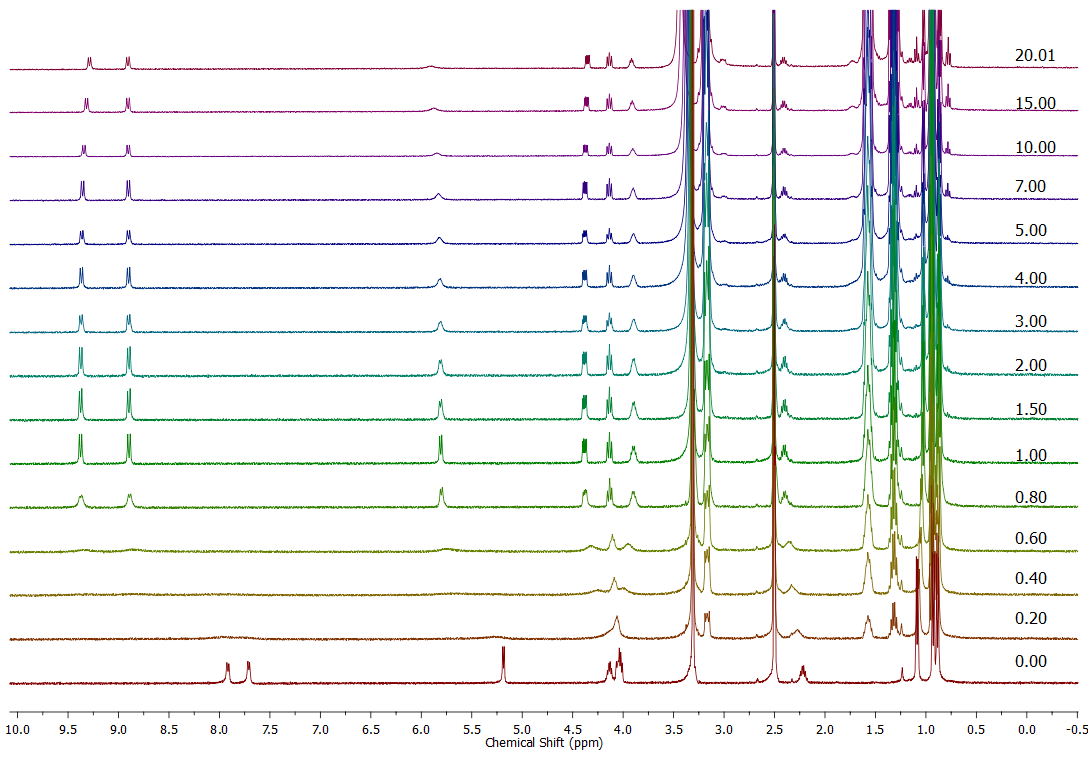


Figure S27. Partial 1H NMR (400 MHz) spectra of 1 (3 mM) with addition of TBA2SeO4 in DMSO-d6 at 300 K


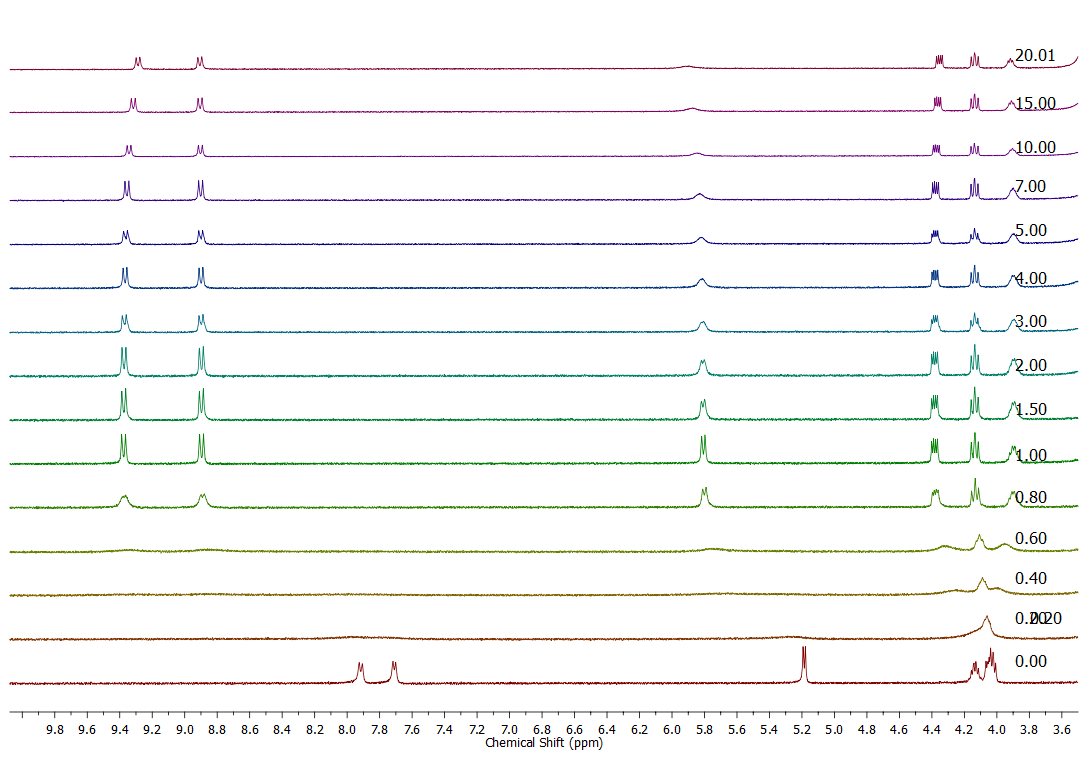


Figure S28. Partial 1H NMR (400 MHz) spectra of 1 (3 mM) with addition of TBA2SeO4 in DMSO-d6 at 300 K


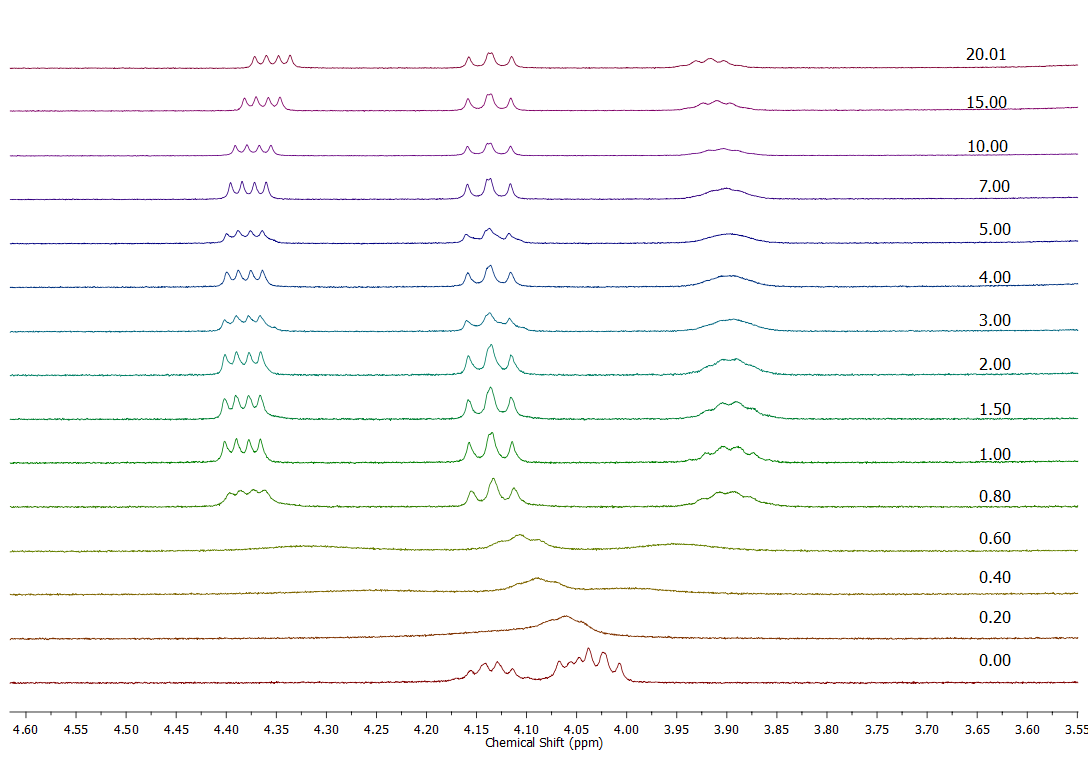


Figure S29. Partial 1H NMR (400 MHz) spectra of 1 (3 mM) with addition of TBA2SeO4 in DMSO-d6 at 300 K

## TBA2SeO4 20% H2O in DMSO-d6


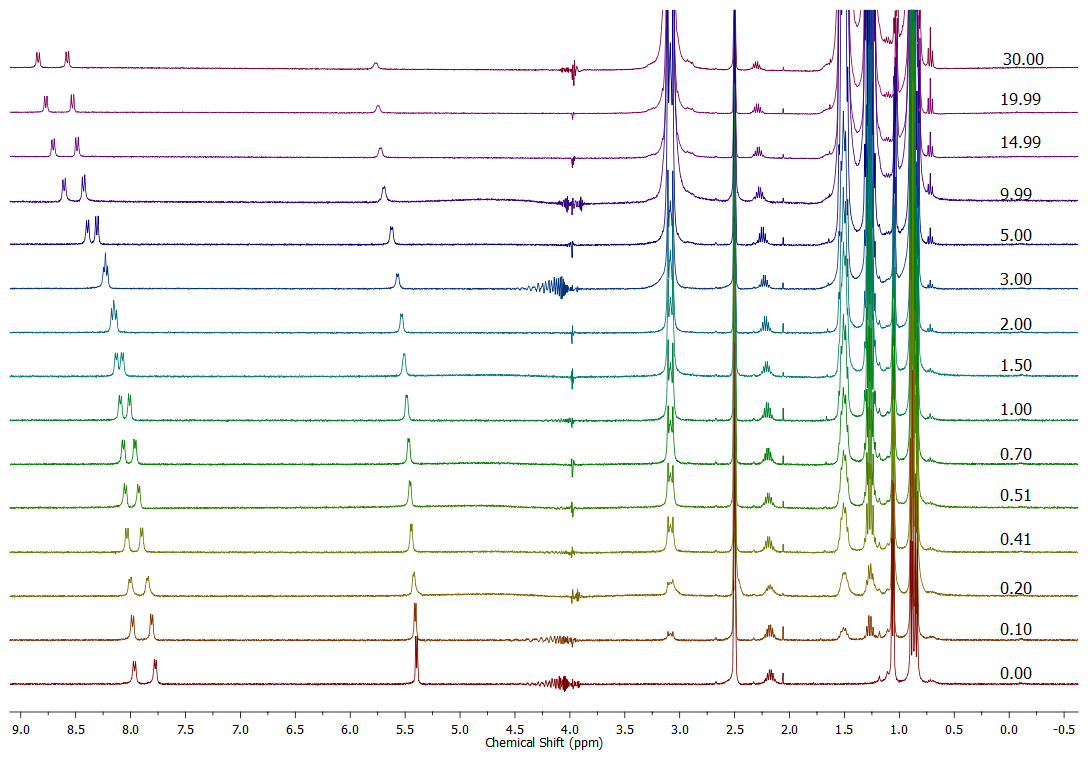


Figure S30. Partial 1H NMR (400 MHz) spectra of 1 (3 mM) with addition of TBA2SeO4 in 20% H2O in DMSO-d6 at 300 K


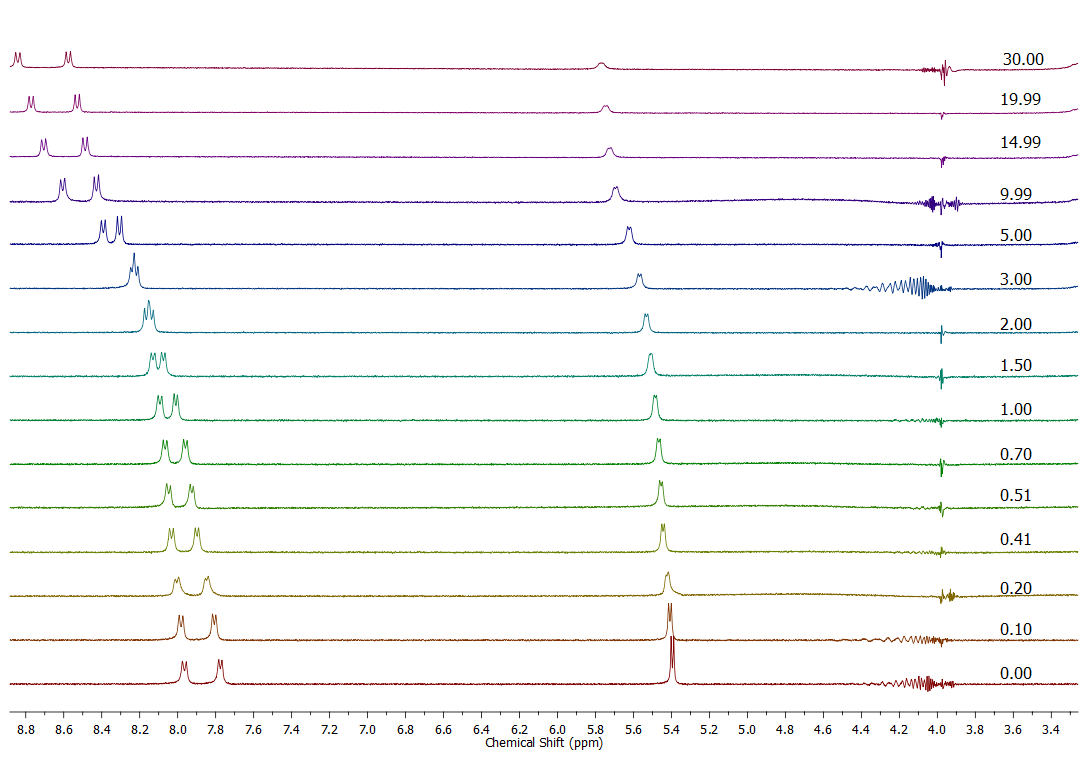


Figure S31. Partial 1H NMR (400 MHz) spectra of 1 (3 mM) with addition of TBA2SeO4 in 20% H2O in DMSO-d6 at 300 K

Figure S32. Binding isotherm of the NH (Thr) proton with addition of TBA2SeO4 in 20% H2O in DMSO-d6at 300 K with fitting shown.

Figure S33. Binding isotherm of the NH (Val) proton with addition of TBA2SeO4 in 20% H2O in DMSO-d6at 300 K with fitting shown.

Figure S34. Binding isotherm of the hydroxyl proton with addition of TBA2SeO4 in 20% H2O in DMSO-d6at 300 K with fitting shown.

## Ion Screen


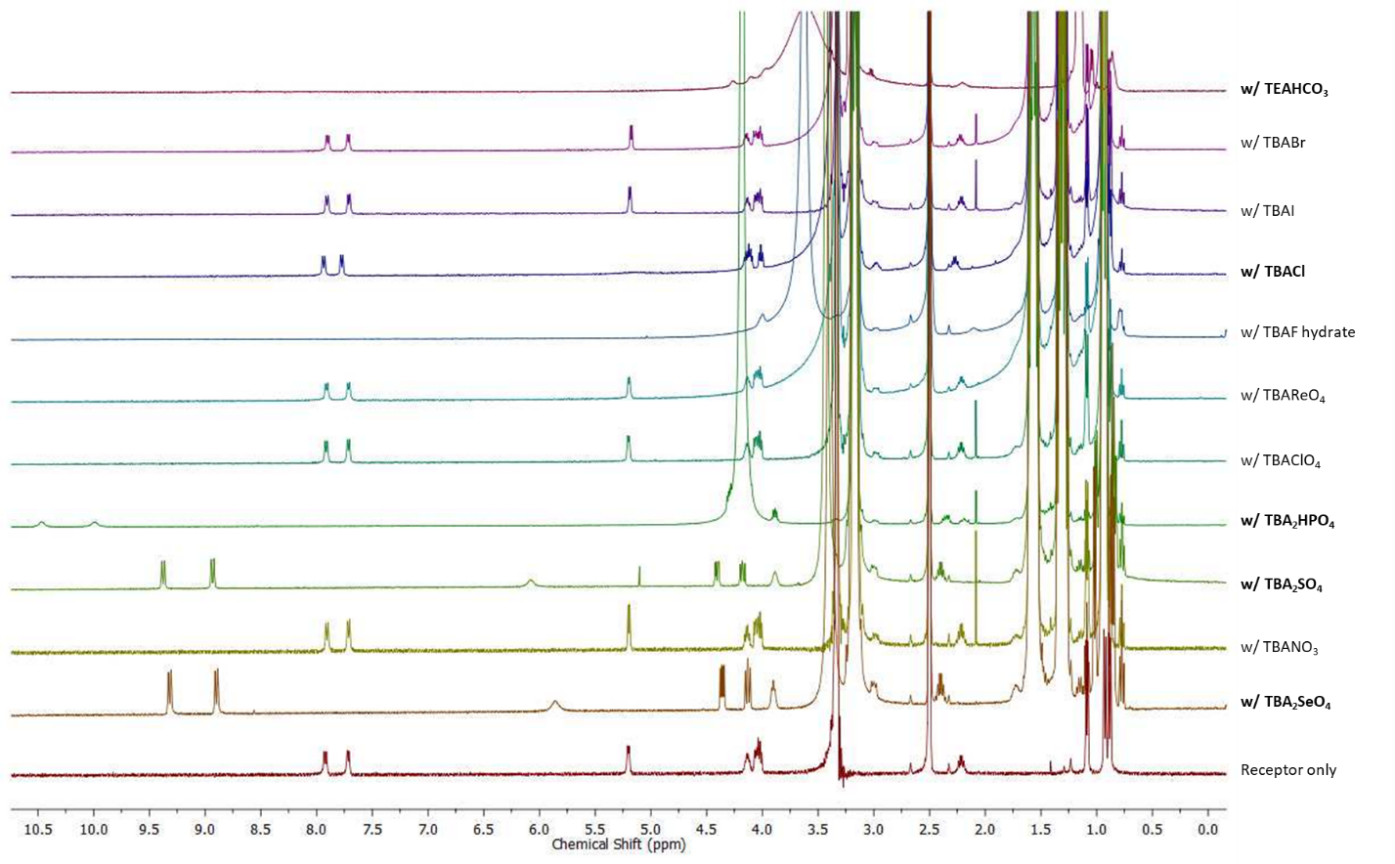


**w/ TBAH2PO4**

Figure S35. 1H NMR (400 MHz) screen of 1 (3 mM) with addition of 20 equivalents of various TBA salts and TEAHCO3 in DMSO-d6 at 300 K


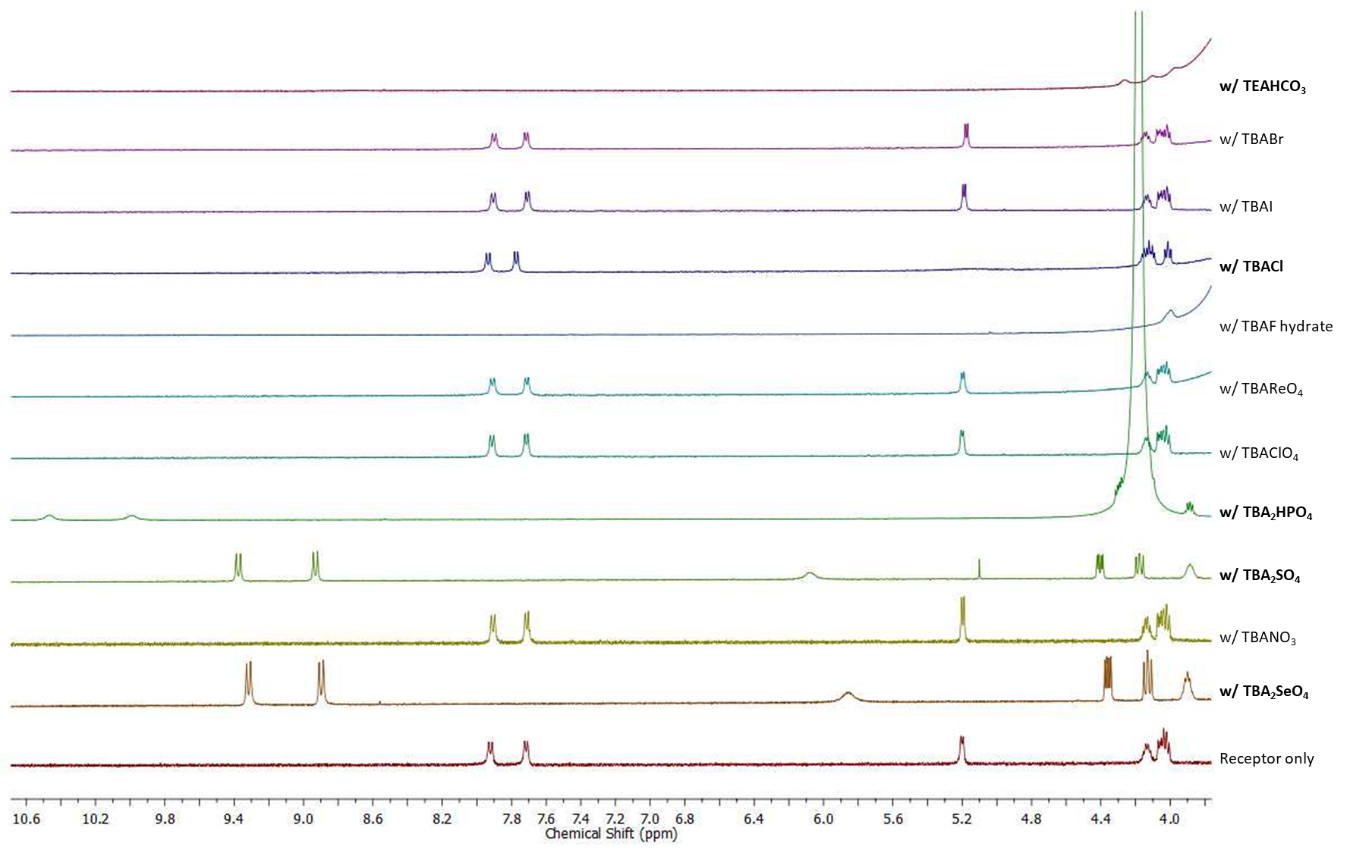


**w/ TBAH2PO4**

Figure S36. 1H NMR (400 MHz) screen of 1 (3 mM) with addition of 20 equivalents of various TBA salts and TEAHCO3 in DMSO-d6 at 300 K.

**References**

1. D. Skropeta, K. A. Jolliffe and P. Turner, *Journal of Organic Chemistry*, 2004, **69**, 8804-8809.

2. <http://app.supramolecular.org/bindfit>, (accessed 30.10.2019).
